# Supplementary material
Source: PubMed Central journal article supplement (PMC6938561)

# Supplementary Figure 1.

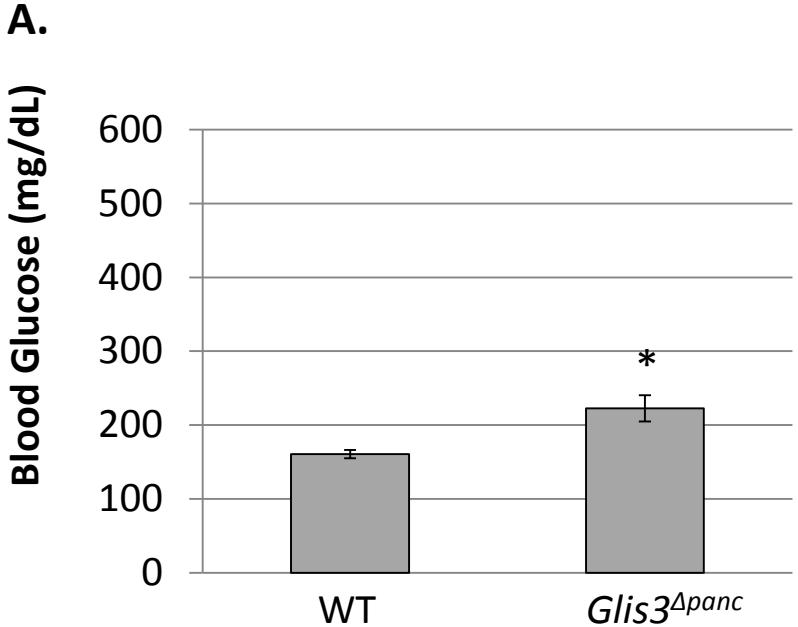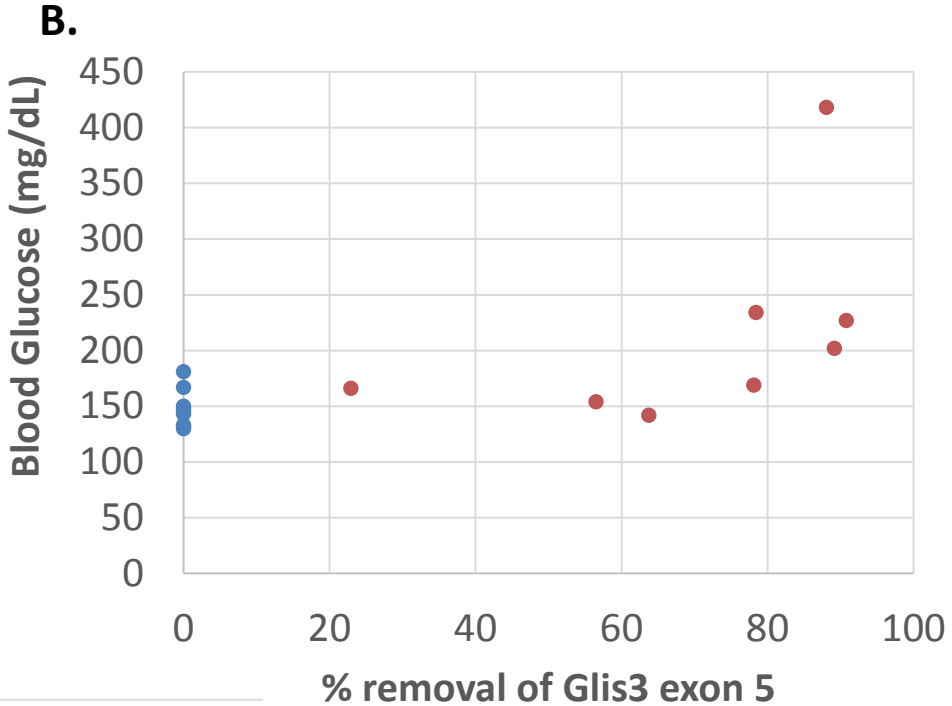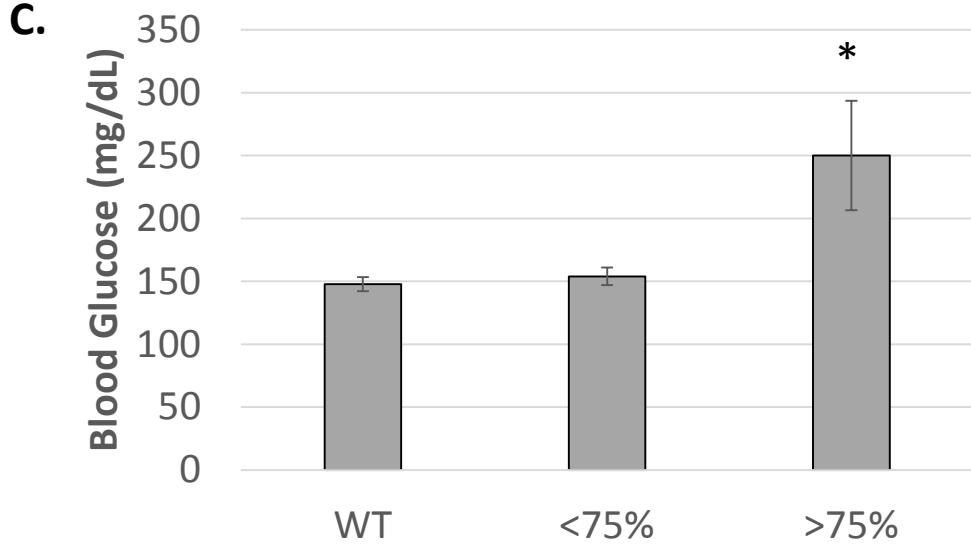

Supplement: NIHMS1536644-supplement-01.pdf [file NIHMS1536644-supplement-01.pdf]

## Supplementary Figure 2.

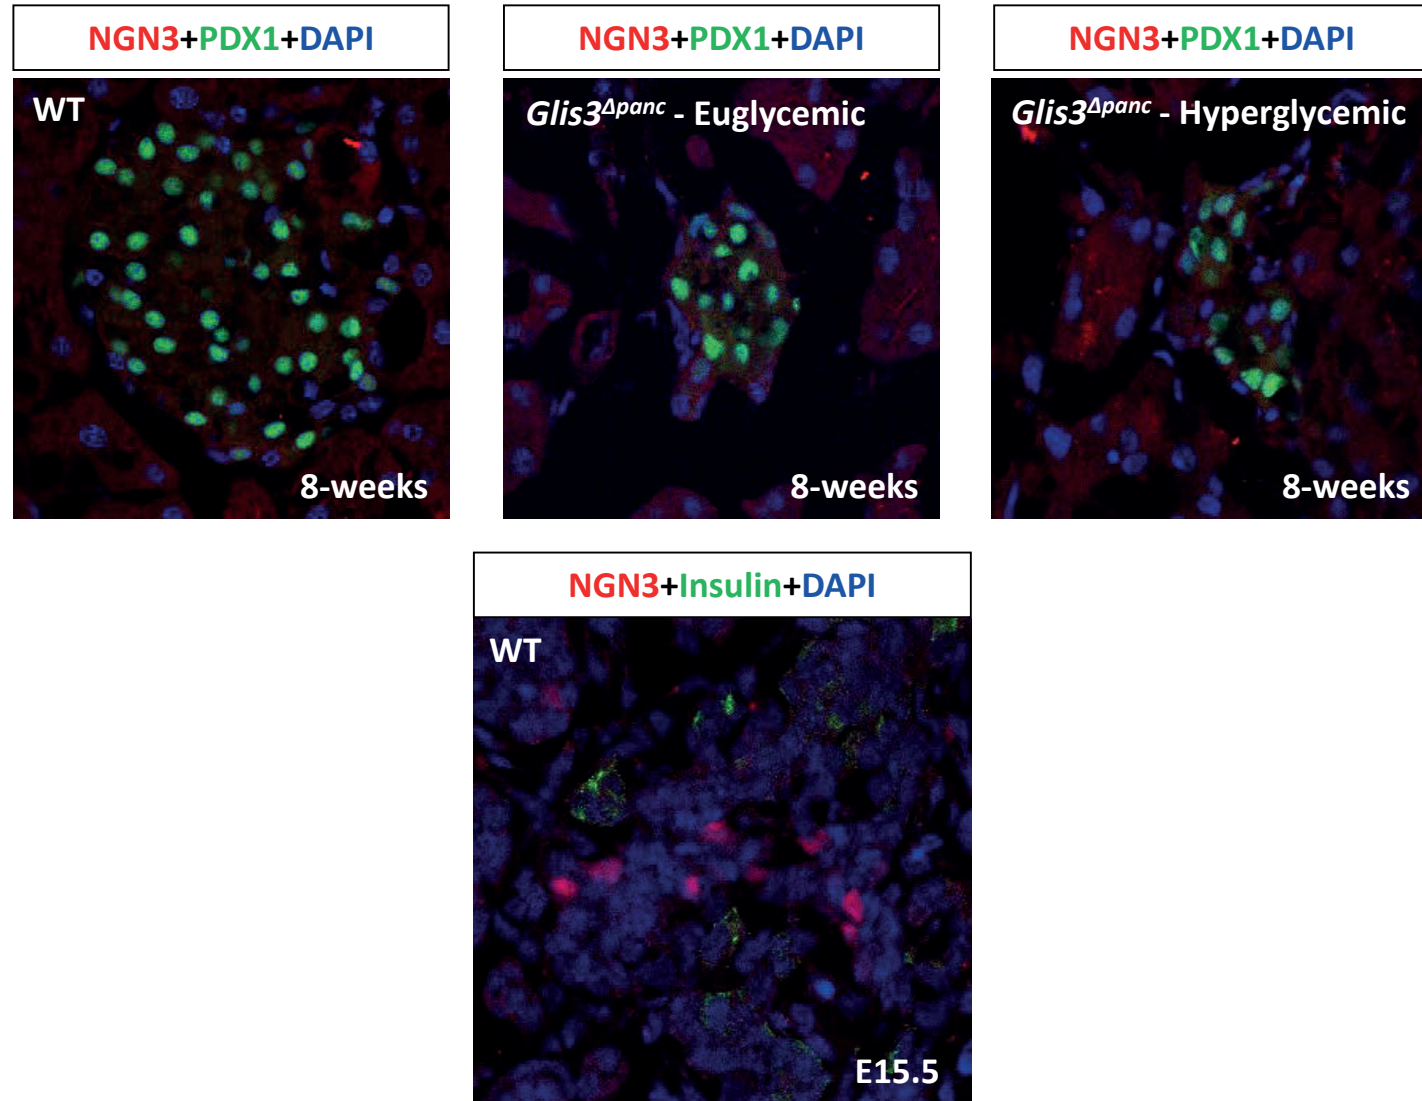

Supplement: NIHMS1536644-supplement-02.pdf [file NIHMS1536644-supplement-02.pdf]

### Supplementary Figure 3.

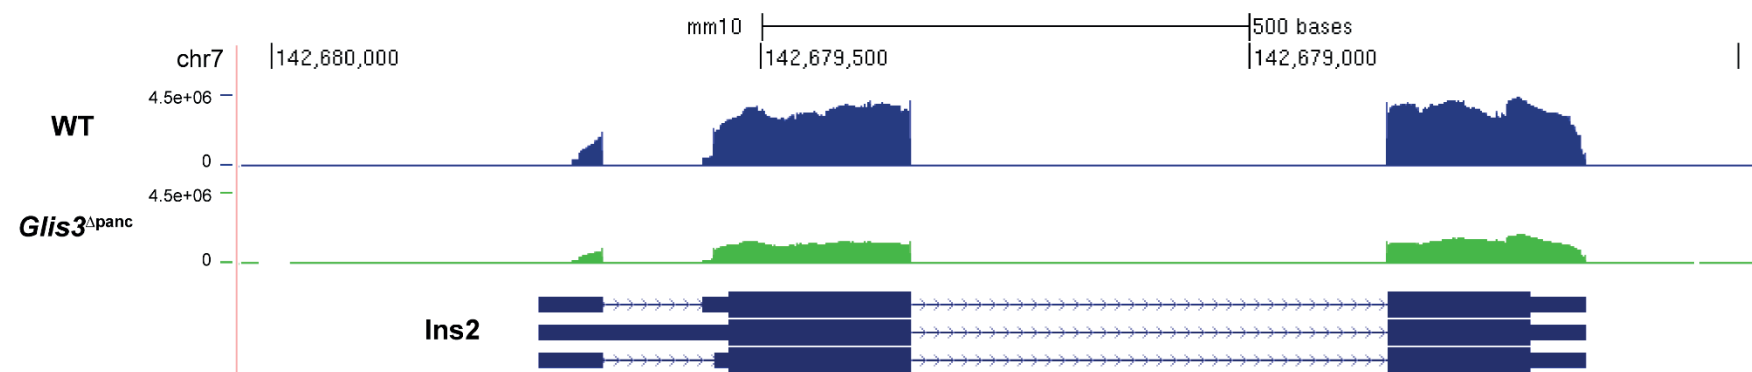

Supplement: NIHMS1536644-supplement-03.pdf [file NIHMS1536644-supplement-03.pdf]

Supplementary Figure 4.

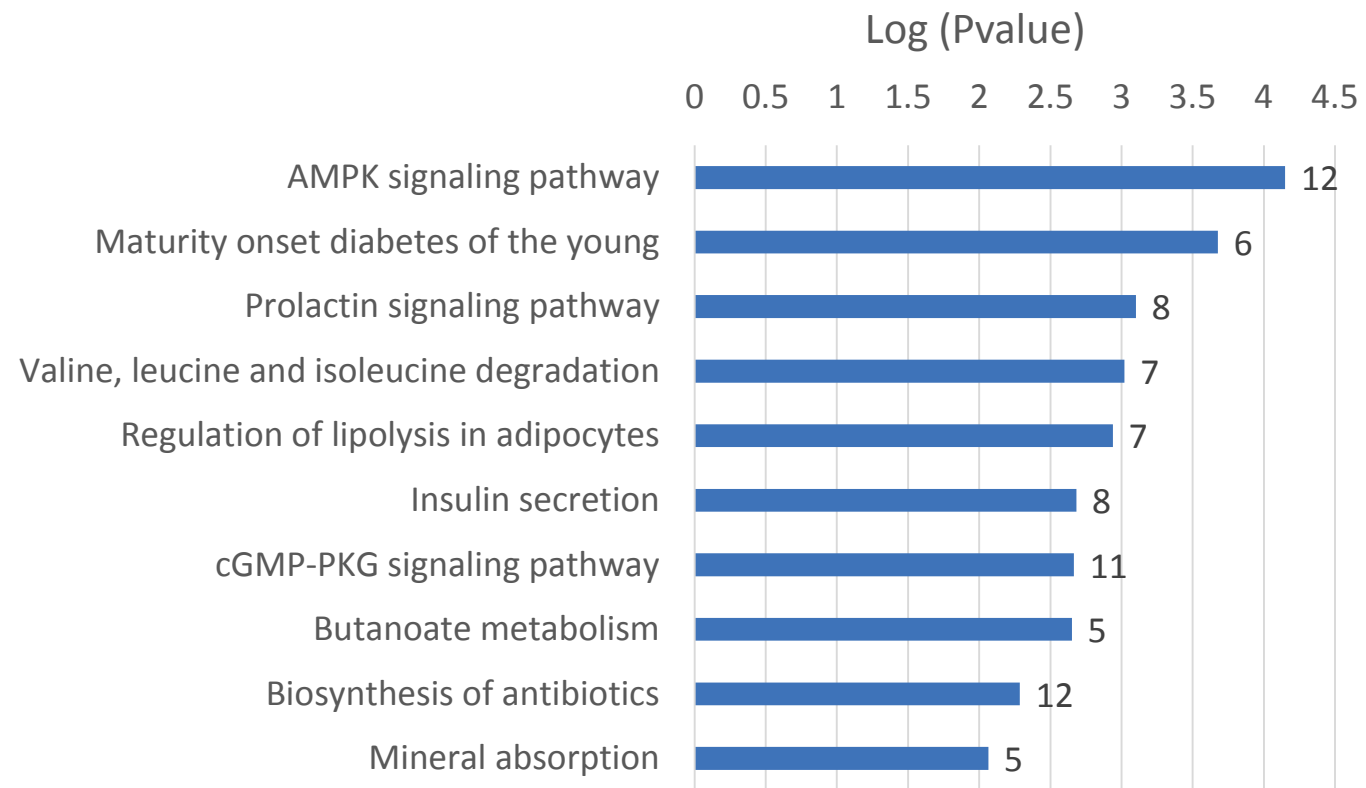

Supplement: NIHMS1536644-supplement-04.pdf [file NIHMS1536644-supplement-04.pdf]

Supplementary Figure 5.

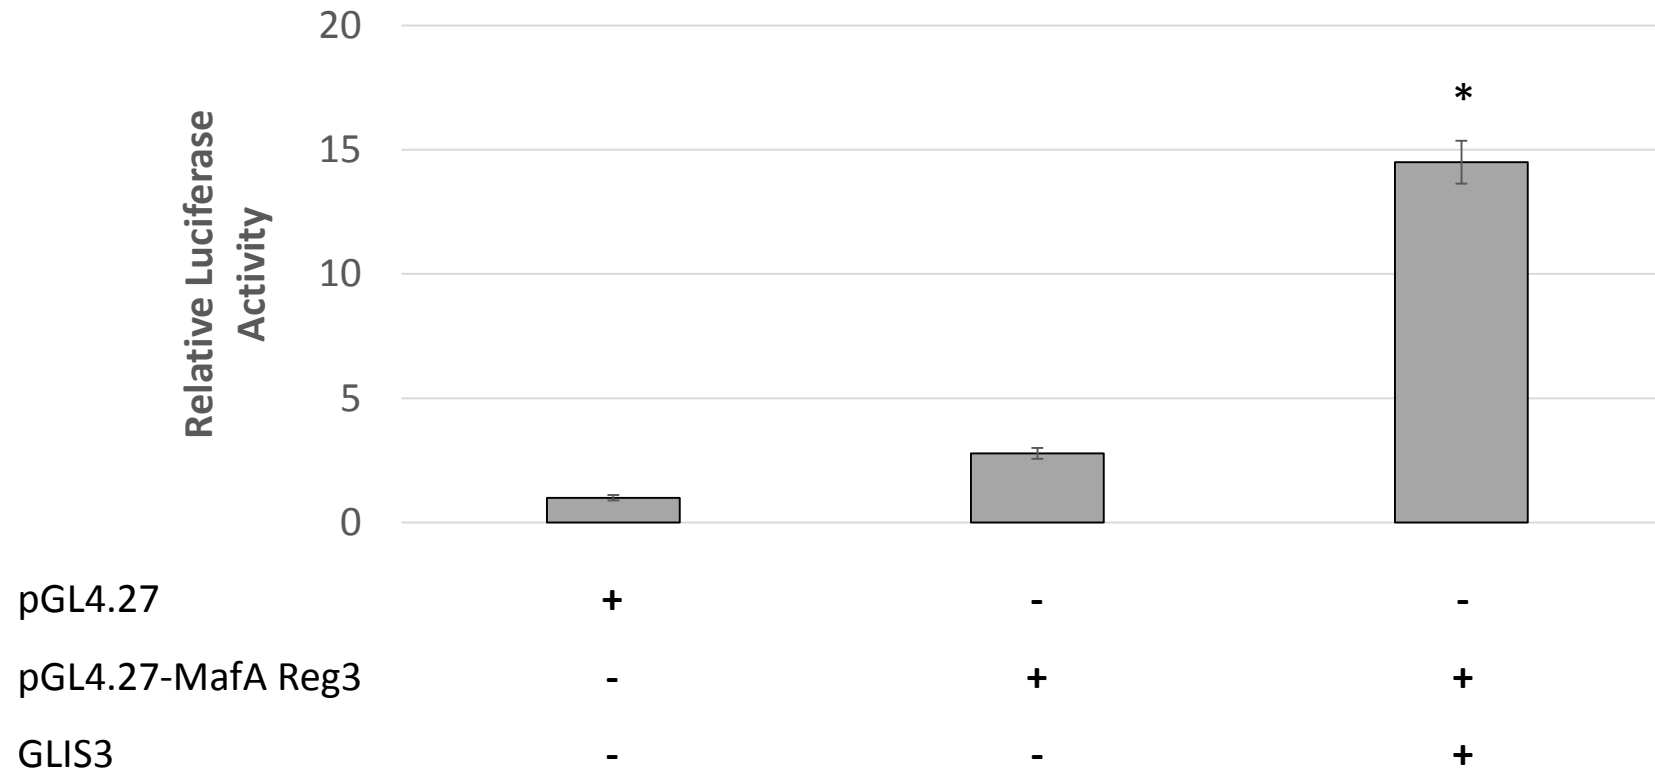

Supplement: NIHMS1536644-supplement-05.pdf [file NIHMS1536644-supplement-05.pdf]

Supplementary Figure 6.

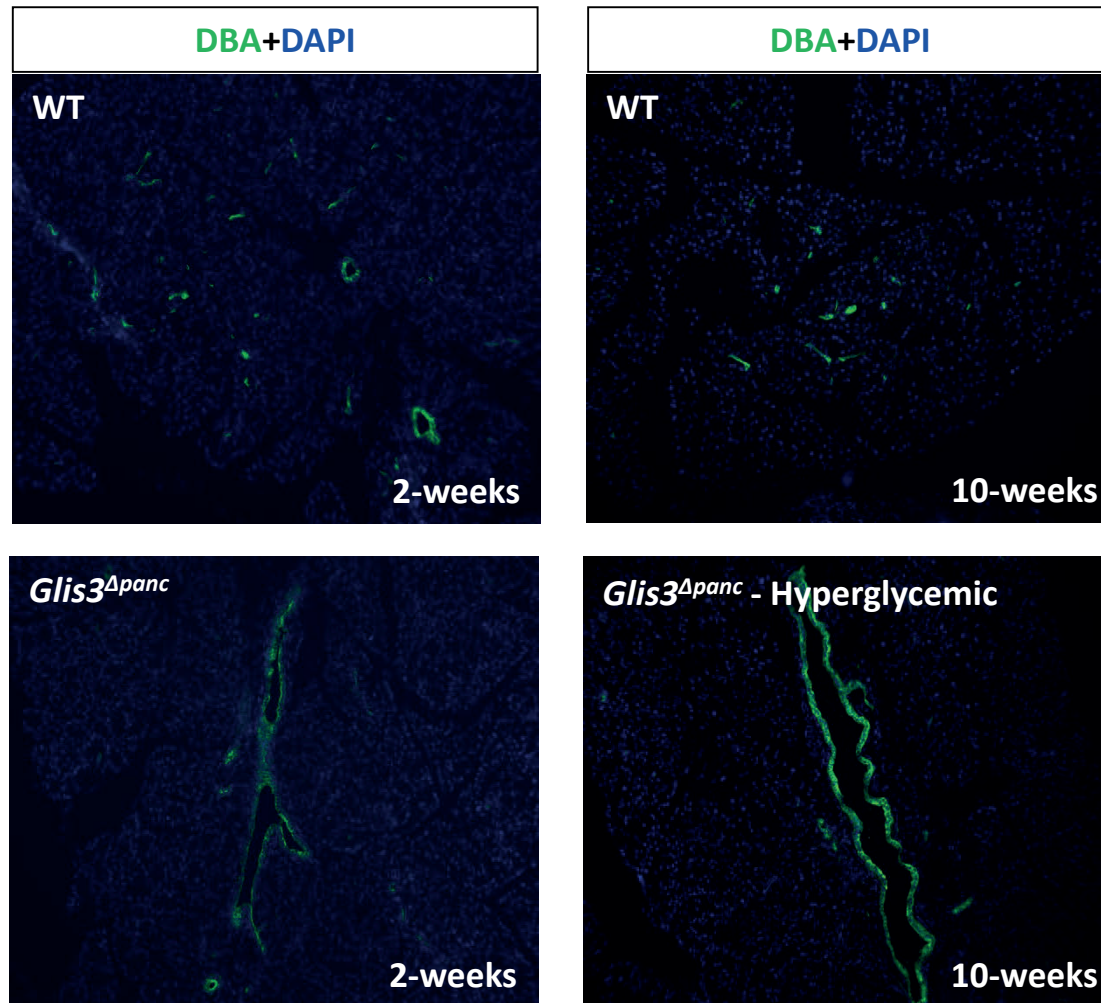

Supplement: NIHMS1536644-supplement-06.pdf [file NIHMS1536644-supplement-06.pdf]

Supplementary Figure 7.

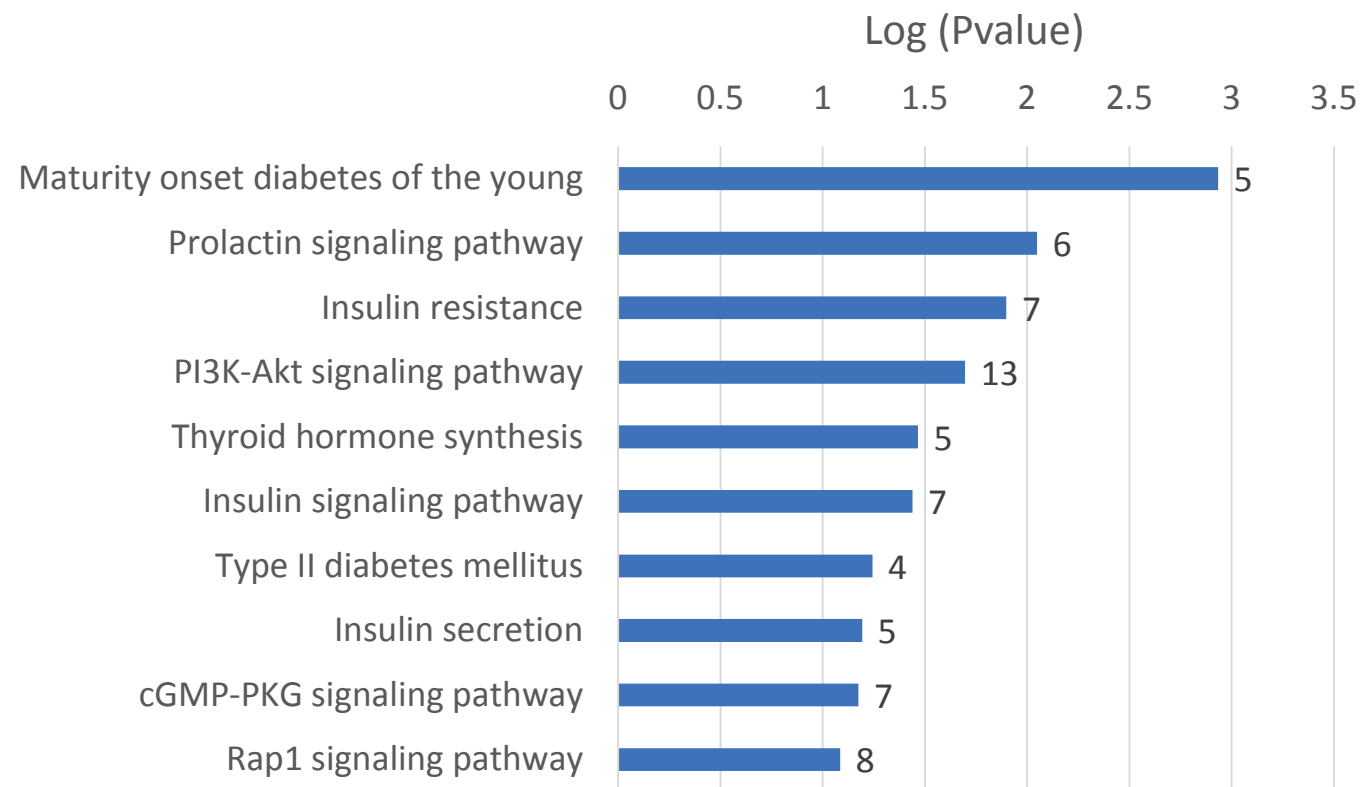

Supplement: NIHMS1536644-supplement-07.pdf [file NIHMS1536644-supplement-07.pdf]
